# Supplementary material
Source: publisher figshare collection journal article supplement (https://tandf.figshare.com/ndownloader/files/18841853)
Supplement: Supplementary file 1 [file 18841853]

**Supplementary table 1.** *P*, *I*, and *L* values for different units in Southern Jiangsu.

| **Unit** | **Land area (sq. km)** | **Construction land (sq. km)** | ***P* value** | ***I* value** | ***L* value** |
| --- | --- | --- | --- | --- | --- |
| City proper of Nanjing | 773.89 | 399.22 | 2.19 | 2.15 | 0.89 |
| Jiangning | 1577.75 | 394.05 | 1.06 | 0.62 | 1.02 |
| Pukou | 910.49 | 179.08 | 0.83 | 0.77 | 1.10 |
| Luhe | 1470.99 | 317.84 | 0.92 | 0.52 | 1.10 |
| Lishui | 1063.67 | 145.77 | 0.58 | 0.60 | 1.15 |
| Gaochun | 790.23 | 104.73 | 0.56 | 0.81 | 1.14 |
| City proper of Wuxi | 71.50 | 64.50 | 3.83 | 2.68 | 0.66 |
| Xishan | 399.11 | 141.97 | 1.51 | 0.85 | 0.94 |
| Huishan | 325.12 | 128.68 | 1.68 | 0.95 | 1.01 |
| Binhu | 638.60 | 102.43 | 0.68 | 1.26 | 1.05 |
| Xinwu | 218.72 | 126.68 | 2.46 | 1.26 | 0.77 |
| Jiangyin | 986.97 | 367.24 | 1.58 | 1.06 | 1.01 |
| Yixing | 1987.90 | 284.14 | 0.61 | 0.79 | 1.12 |
| City proper of Changzhou | 163.51 | 138.56 | 3.60 | 1.55 | 0.60 |
| Wujin | 1245.84 | 325.73 | 1.11 | 0.88 | 1.00 |
| Xinbei | 452.60 | 162.51 | 1.52 | 0.93 | 0.85 |
| Jintan | 983.21 | 117.62 | 0.51 | 0.81 | 1.14 |
| Liyang | 1526.99 | 179.49 | 0.50 | 0.73 | 1.13 |
| City proper of Suzhou | 83.42 | 73.98 | 3.76 | 1.94 | 0.51 |
| Xiangcheng | 489.96 | 153.78 | 1.33 | 0.78 | 1.07 |
| Suzhou new district | 332.37 | 112.26 | 1.43 | 1.24 | 0.85 |
| Suzhou industrial park | 278.19 | 169.60 | 2.59 | 1.44 | 0.84 |
| Wuzhong | 2231.46 | 227.98 | 0.43 | 0.82 | 1.04 |
| Wujiang | 1237.44 | 290.96 | 1.00 | 0.86 | 1.07 |
| Changshu | 1276.31 | 348.44 | 1.16 | 0.89 | 1.03 |
| Zhangjiagang | 986.72 | 278.71 | 1.20 | 1.08 | 1.00 |
| Kunshan | 931.51 | 352.40 | 1.61 | 1.16 | 0.93 |
| Taicang | 809.93 | 196.60 | 1.03 | 0.79 | 0.93 |
| City proper of Zhenjiang | 460.27 | 154.44 | 1.42 | 1.18 | 1.08 |
| Dantu | 627.60 | 94.09 | 0.64 | 0.60 | 1.15 |
| Danyang | 1047.23 | 234.23 | 0.95 | 0.76 | 1.04 |
| Yangzhong | 327.34 | 69.50 | 0.90 | 1.02 | 1.15 |
| Jurong | 1377.86 | 180.27 | 0.56 | 0.53 | 1.14 |
| Sub-total | 28084.70 | 6617.48 | 1.00 | 1.00 | 1.00 |
